# Supplementary material for: Synthesis, Quality Control and Preliminary Activity Evaluation of a New Compound HM475
Source: MDPI journal article supplement (doi:10.3390/molecules28093753), 2023-04-27
Supplement: s1 [file s1]

# **Synthesis, Quality Control And Preliminary Activity Evaluation of a New Compound HM475**

**Jieqing Guo <sup>1,2</sup>, Luming Xie <sup>1,2</sup>, Jing Zhang <sup>1,2</sup>, Han Cao <sup>1,2</sup>, Juanxia Wang <sup>1,2</sup>,  
Xia Wu <sup>1,2,\*</sup> and Yifan Feng <sup>1,2,\*</sup>**

<sup>1</sup> New Drug Research and Development Center, Guangdong Pharmaceutical University, Guangzhou 510006, China

<sup>2</sup> Guangdong Provincial Key Laboratory of Advanced Drug Delivery, Guangdong Provincial Engineering Center of Topical Precise Drug Delivery System, Guangdong Pharmaceutical University, Guangzhou 510006, China

\* Correspondence: wxiaxia@163.com (X.W.); yffeng@gdpu.edu.cn (Y.F.)

## Supplementary Information

Figure S1 UV-Vis spectrum of HM475.

Figure S2 Infrared (IR) spectrum of HM475.

Figure S3  $^1\text{H}$  NMR and  $^{13}\text{C}$  NMR ( $\text{DMSO-d}_6$ ) spectrum of HM475.

Figure S4  $^1\text{H}$ - $^1\text{H}$  COSY spectrum of HM475.

Figure S5 HMBC spectrum of HM475.

Figure S6 Dept spectrum of HM475.

Figure S7 QC spectrum of HM475.

Figure S8 HRMS spectrum of HM475.

Figure S9 HM475 HPLC chromatogram.

Figure S10 Ortep diagram of HM475.

Figure S11 Data of the Ortep diagram.

Table S1  $^1\text{H}$  and  $^{13}\text{C}$  NMR data for HM475 ( $\text{DMSO-d}_6$ ).

Table S2 Solubility of HM475.

Table S3 Appearance and smell of HM475.

Table S4 Results of moisture absorption determination of HM475.

Table S5 Results of melting point determination of HM475.

Table S6 Results of chloride inspection.

Table S7 Results of iron salt inspection.

Table S8 Results of determination of weight loss by drying.

Table S9 Results of determination of burning residue.

Table S10 Results of inspection of heavy metal lead.

Table S11 Results of arsenic salt inspection.

Table S12 Results of precision of instrument.

Table S13 Results of intra-day precision.

Table S14 Results of daytime precision.

Table S15 Results of repetitive test results.

Table S16 Results of recovery test results.

Table S17 The influence of various factors on HM475.

Table S18 Results of accelerated test.

Table S19 Results of long-term test.

**Figure S1** UV spectrum of HM475

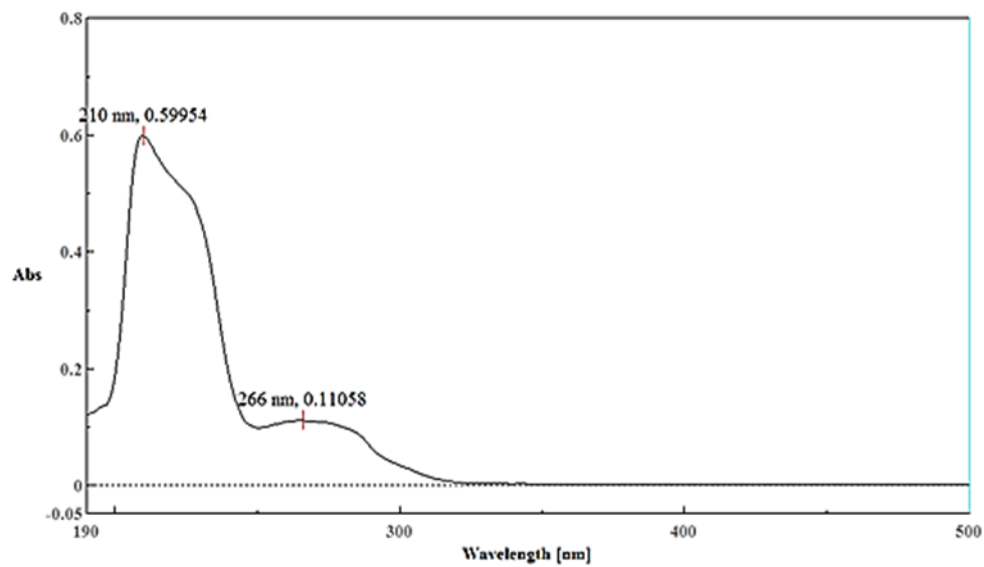

**Figure S2** Infrared (IR) spectrum of HM475

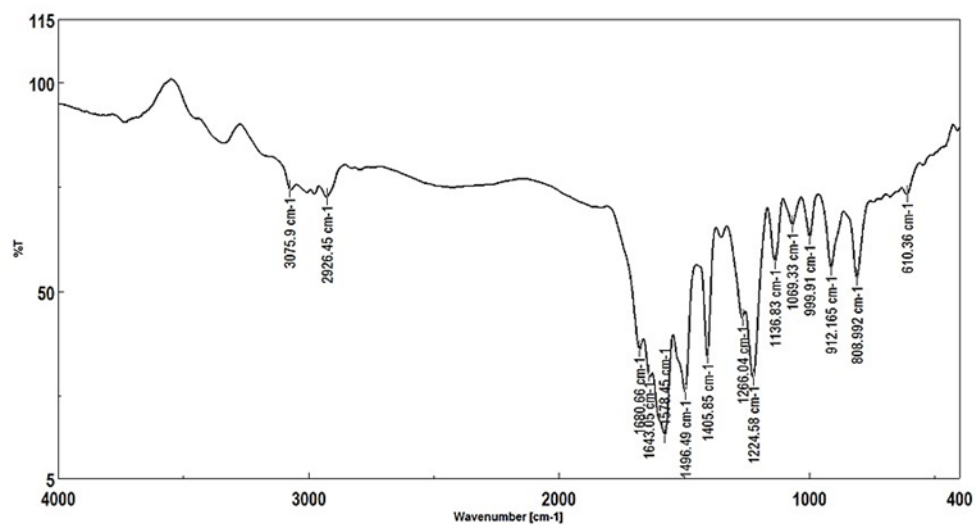

[illegible]

**Figure S4**  $^1\text{H}$ - $^1\text{H}$ COSY spectrum of HM475

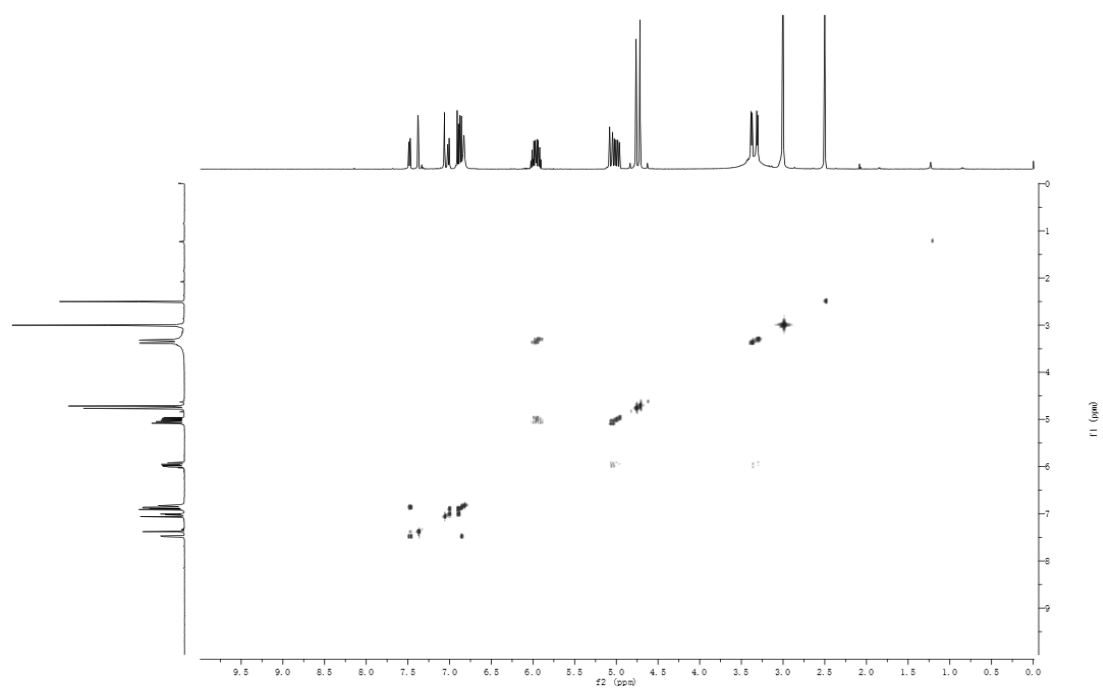

**Figure S5** HMBC spectrum of HM475

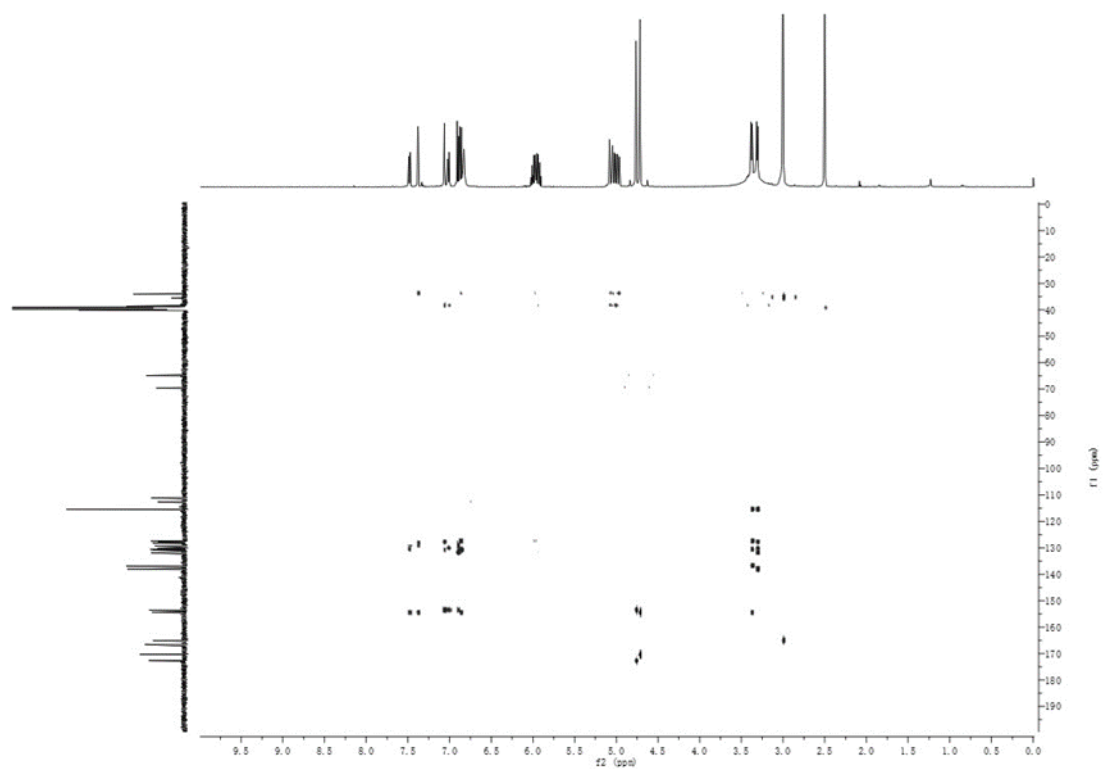

**Figure S6** Dept-135° spectrum of HM475



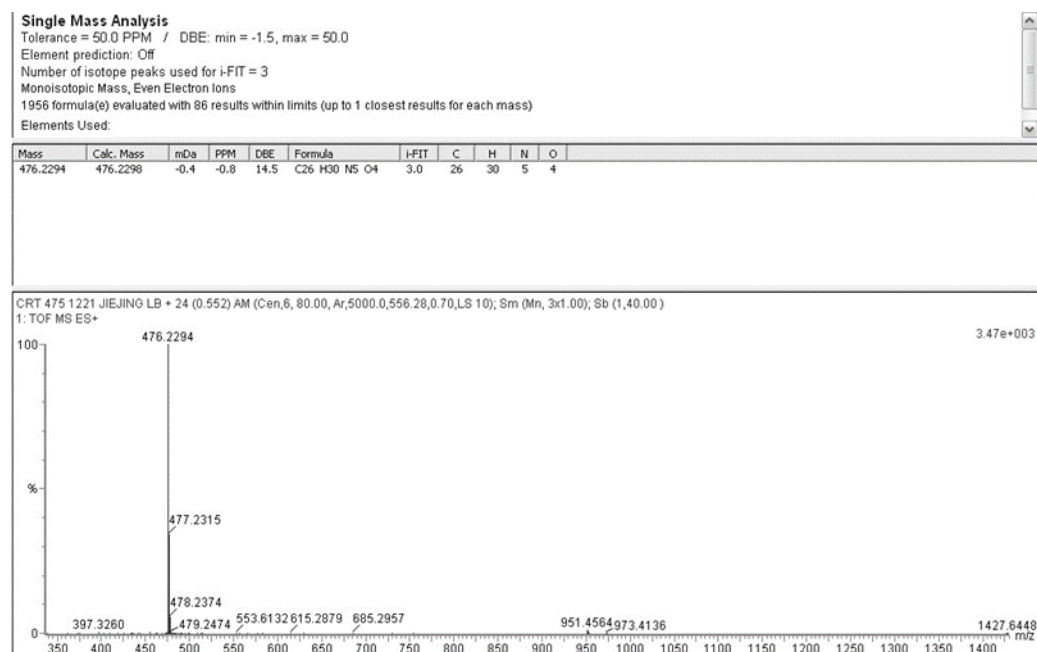

**Figure S9** HM475 HPLC Chromatogram (266nm).

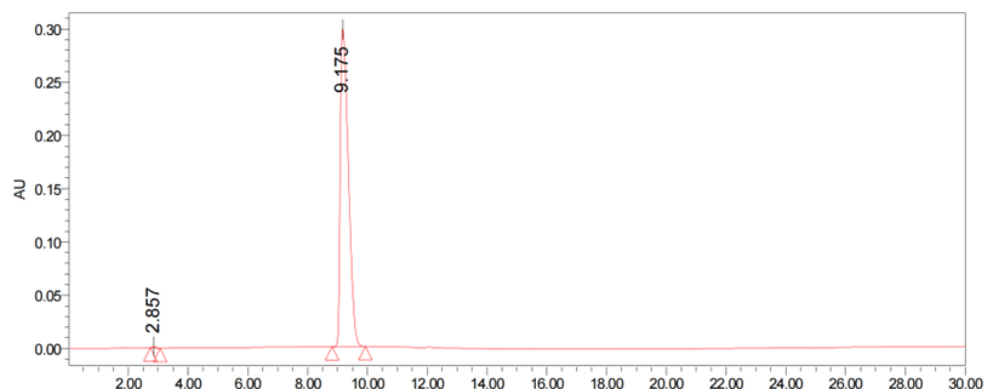

**Figure S10** Ortep diagram of HM475.

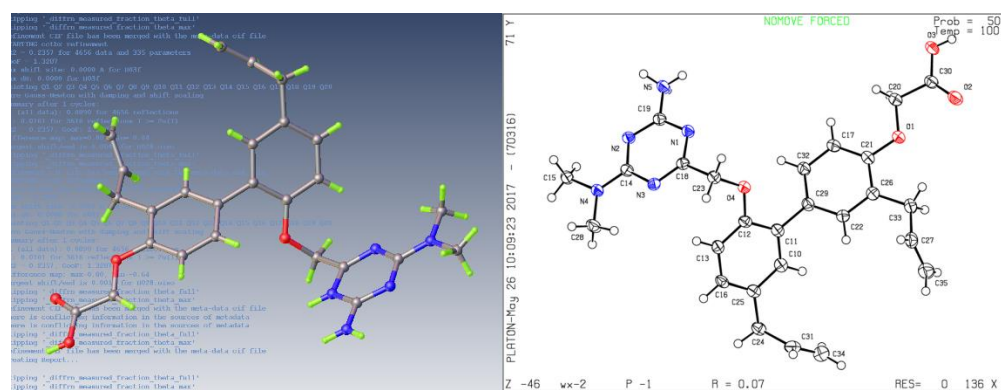



**Figure S11** Data of the Ortep diagram

|                                                               |                                 |                    |                 |
|---------------------------------------------------------------|---------------------------------|--------------------|-----------------|
| Bond precision: C-C = 0.0042 Å                                |                                 | Wavelength=1.54178 |                 |
| Cell:                                                         | a=4.2879(3)                     | b=15.4405(9)       | c=19.2940(12)   |
|                                                               | alpha=107.806(6)                | beta=96.102(6)     | gamma=95.991(6) |
| Temperature:                                                  | 100 K                           |                    |                 |
|                                                               | Calculated                      | Reported           |                 |
| Volume                                                        | 1196.62(14)                     | 1196.61(14)        |                 |
| Space group                                                   | P -1                            | P -1               |                 |
| Hall group                                                    | -P 1                            | -P 1               |                 |
| Moiety formula                                                | C26 H30 N5 O4                   | C26 H30 N5 O4      |                 |
| Sum formula                                                   | C26 H30 N5 O4                   | C26 H30 N5 O4      |                 |
| Mr                                                            | 476.55                          | 476.55             |                 |
| Dx, g cm-3                                                    | 1.323                           | 1.323              |                 |
| Z                                                             | 2                               | 2                  |                 |
| Mu (mm-1)                                                     | 0.742                           | 0.742              |                 |
| F000                                                          | 506.0                           | 506.0              |                 |
| F000'                                                         | 507.54                          |                    |                 |
| h, k, lmax                                                    | 5, 19, 23                       | 5, 19, 23          |                 |
| Nref                                                          | 4838                            | 4656               |                 |
| Tmin, Tmax                                                    | 0.762, 0.849                    | 0.669, 1.000       |                 |
| Tmin'                                                         | 0.682                           |                    |                 |
| Correction method= # Reported T Limits: Tmin=0.669 Tmax=1.000 |                                 |                    |                 |
| AbsCorr = MULTI-SCAN                                          |                                 |                    |                 |
| Data completeness= 0.962                                      | Theta(max)= 73.512              |                    |                 |
| R(reflections)= 0.0682( 3616)                                 | wR2(reflections)= 0.2276( 4656) |                    |                 |
| S = 1.225                                                     | Npar= 320                       |                    |                 |

**Table S1** <sup>1</sup>H and <sup>13</sup>C NMR data for HM475 (DMSO-*d*<sub>6</sub>)

| Location | HM475                            |        |
|----------|----------------------------------|--------|
|          | δH                               | δC     |
| 1, 1'    | 5.02 (4H, m)                     | 115.48 |
| 2        | 5.93(1H, m)                      | 136.89 |
| 2'       | 5.99(1H, m)                      | 138.05 |
| 3        | 3.38 (2H, d, <i>J</i> = 7.0 Hz)  | 38.64  |
| 3'       | 3.31 (2H, d, <i>J</i> = 6.5 Hz)  | 35.01  |
| 4        |                                  | 132.96 |
| 4'       |                                  | 132.96 |
| 5        | 7.06 (1H, s)                     | 128.24 |
| 5'       |                                  | 154.40 |
| 6        | 6.91 (1H, d, <i>J</i> = 8.5 Hz)) | 112.12 |
| 6'       | 6.91(1H, d, <i>J</i> = 8.5 Hz)   | 113.86 |
| 7        |                                  | 153.54 |
| 7'       | 7.02 (1H, s)                     | 127.40 |

|        |              |        |
|--------|--------------|--------|
| 8      |              | 128.24 |
| 8'     |              | 128.24 |
| 9      | 7.38 (1H, s) | 130.84 |
| 9'     | 7.49(1H,S)   | 130.84 |
| 10     | 4.76 (2H, s) | 70.45  |
| 10'    | 4.72 (2H, s) | 65.87  |
| 11     |              | 172.63 |
| 11'    |              | 165.08 |
| 12     |              | 170.32 |
| 13     |              | 166.55 |
| 14, 15 | 3.07(6H, s)  | 35.64  |

**Table S2** Solubility of HM475

| Solvents      | Sample weight(mg) | Add solvent volume (mL) | Solvent volume per gram of sample (mL) | Dissolution | Conclusion            |
|---------------|-------------------|-------------------------|----------------------------------------|-------------|-----------------------|
| Methanol      | 10                | 0.01                    | 1                                      | insoluble   | Very slightly soluble |
|               |                   | 0.1                     | 10                                     | insoluble   |                       |
|               |                   | 0.3                     | 30                                     | insoluble   |                       |
|               |                   | 1.0                     | 100                                    | insoluble   |                       |
|               |                   | 3.0                     | 300                                    | insoluble   |                       |
|               |                   | 10                      | 1000                                   | insoluble   |                       |
|               |                   | 90                      | 9000                                   | dissolve    |                       |
| 0.1mol/L NaOH | 10                | 0.01                    | 1                                      | insoluble   | Dissolve              |
|               |                   | 0.1                     | 20                                     | insoluble   |                       |
|               |                   | 0.2                     | 20                                     | dissolve    |                       |
| Ethanol       | 10                | 0.01                    | 1                                      | insoluble   | Almost insoluble      |
|               |                   | 0.1                     | 10                                     | insoluble   |                       |
|               |                   | 0.3                     | 30                                     | insoluble   |                       |
|               |                   | 1.0                     | 100                                    | insoluble   |                       |
|               |                   | 3.0                     | 300                                    | insoluble   |                       |
|               |                   | 10                      | 1000                                   | insoluble   |                       |

|              |    |      |       |                          |           |
|--------------|----|------|-------|--------------------------|-----------|
|              |    | 100  | 10000 | insoluble                |           |
|              |    | 0.01 | 1     | insoluble                |           |
|              |    | 0.1  | 10    | insoluble                |           |
|              |    | 0.3  | 30    | insoluble                |           |
| 0.1mol/L HCl | 10 | 1.0  | 100   | insoluble                | Almost    |
|              |    | 3.0  | 300   | insoluble                | insoluble |
|              |    | 10   | 1000  | insoluble                |           |
|              |    | 100  | 10000 | not completely dissolved |           |
|              |    | 0.01 | 1     | insoluble                |           |
|              |    | 0.1  | 10    | insoluble                |           |
|              |    | 0.3  | 30    | insoluble                |           |
| Water        | 10 | 1.0  | 100   | insoluble                |           |
|              |    | 3.0  | 300   | insoluble                | insoluble |
|              |    | 10   | 1000  | insoluble                |           |
|              |    | 100  | 10000 | insoluble                |           |

**Table S3** Appearance and smell of HM475

| Batch  | color        | appearance | smell                  |
|--------|--------------|------------|------------------------|
| 190304 | light yellow | powder     | Odorless and tasteless |
| 190313 | light yellow | powder     | Odorless and tasteless |
| 190402 | light yellow | powder     | Odorless and tasteless |

**Table S4** Results of moisture absorption determination of HM475

| Batch  | A(g)    | B(g)    | C(g)    | D(g)   | hygroscopicity (%) |
|--------|---------|---------|---------|--------|--------------------|
| 190304 | 26.5683 | 27.7792 | 27.7828 | 0.0036 | 0.30               |
| 190313 | 26.3772 | 27.4936 | 27.4965 | 0.0029 | 0.26               |
| 190402 | 25.3546 | 26.5669 | 26.5702 | 0.0033 | 0.27               |

A: Weighing bottle B: Sample + weighing bottle weight

C: Sample + weighing bottle weight after 24 days D: Gain weight

**Table S5** Results of melting point determination of HM475

| Batch  | Initial melting temperature (°C) | full melting temperature (°C) |
|--------|----------------------------------|-------------------------------|
| 190304 | 169                              | 172                           |
| 190313 | 170                              | 171                           |
| 190402 | 170                              | 172                           |

**Table S6** Results of chloride inspection

| Batch  | Standard Sodium Chloride Solution |        |        |        |
|--------|-----------------------------------|--------|--------|--------|
|        | 0.5 ml                            | 1.0 ml | 2.0 ml | 5.0 ml |
| 190304 | +                                 | -      | -      | -      |
| 190313 | +                                 | +      | -      | -      |
| 190402 | +                                 | -      | -      | -      |
| 190415 | +                                 | -      | -      | -      |

**Table S7** Results of iron salt inspection

| Batch  | Standard iron solution |        |        |
|--------|------------------------|--------|--------|
|        | 0.5 ml                 | 1.0 ml | 2.0 ml |
| 190304 | -                      | -      | -      |

|        |   |   |   |
|--------|---|---|---|
| 190313 | - | - | - |
| 190402 | o | - | - |
| 190415 | - | - | - |

**Table S8** Results of determination of weight loss by drying

| Batch  | sample weight (g) | Dehumidifying weight (g) | Loss on drying |
|--------|-------------------|--------------------------|----------------|
| 190304 | 1.0001            | 0.0018                   | 0.18%          |
| 190313 | 1.0001            | 0.0022                   | 0.22%          |
| 190402 | 0.9999            | 0.0016                   | 0.16%          |
| 190415 | 1.0003            | 0.0025                   | 0.25%          |

**Table S9** Results of determination of burning residue

| Batch  | sample weight (g) | Residue weight (g) | Residue content |
|--------|-------------------|--------------------|-----------------|
| 190304 | 2.0036            | 0.0010             | 0.10%           |
| 190313 | 2.0054            | 0.0013             | 0.13%           |
| 190402 | 2.0058            | 0.0009             | 0.09%           |
| 190415 | 2.0060            | 0.0011             | 0.11%           |

**Table S10** Results of inspection of heavy metal lead

| Batch  | Standard lead solution |        |        |        |
|--------|------------------------|--------|--------|--------|
|        | 0.5 ml                 | 1.0 ml | 1.5 ml | 2.0 ml |
| 190304 | -                      | -      | -      | -      |
| 190313 | o                      | -      | -      | -      |
| 190402 | -                      | -      | -      | -      |

|        |   |   |   |   |
|--------|---|---|---|---|
| 190415 | - | - | - | - |
|--------|---|---|---|---|

**Table S11** Results of arsenic salt inspection

| Batch  | testing sample<br>0.5 g | testing sample<br>1.0 g | Testing sample<br>2.0 g |
|--------|-------------------------|-------------------------|-------------------------|
| 190304 | -                       | -                       | -                       |
| 190313 | -                       | -                       | -                       |
| 190402 | -                       | -                       | -                       |
| 190415 | -                       | -                       | -                       |

**Table S12** Results of precision of instrument

| Injections<br>number | Peak A  | Average   | RSD(%) |
|----------------------|---------|-----------|--------|
| 1                    | 5229548 |           |        |
| 2                    | 5243656 |           |        |
| 3                    | 5222918 |           |        |
| 4                    | 5233880 | 5230368.3 | 0.16   |
| 5                    | 5232531 |           |        |
| 6                    | 5219677 |           |        |

**Table S13** Results of intraday precision

| Injection<br>time (h) | 80%     | 100%    | 120%    |
|-----------------------|---------|---------|---------|
| 0                     | 3963004 | 5287325 | 5776148 |

|         |           |           |           |
|---------|-----------|-----------|-----------|
| 2       | 3955404   | 5295198   | 5768669   |
| 4       | 3936798   | 5266095   | 5723918   |
| 6       | 3940639   | 5271426   | 5731581   |
| 8       | 3940294   | 5276209   | 5742899   |
| 10      | 3950692   | 5287331   | 5748657   |
| 12      | 3988241   | 5306074   | 5759117   |
| Average | 3953581.7 | 5284236.9 | 5750141.3 |
| RSD%    | 0.45      | 0.26      | 0.33      |

**Table S14** Results of daytime precision

| Injection<br>time (day) | 80%     | 100%    | 120%      |
|-------------------------|---------|---------|-----------|
| 1                       | 3963004 | 5287325 | 5776148   |
| 2                       | 3955404 | 5295198 | 5768669   |
| 3                       | 3936798 | 5266095 | 5723918   |
| Average                 | 3980951 | 5309795 | 5788250.3 |
| RSD%                    | 1.01    | 0.48    | 0.41      |

**Table S15** Results of repetitive test results

| Number | Peak<br>area | Average | RSD (%) |
|--------|--------------|---------|---------|
| 1      | 5221365      |         |         |

|   |         |            |      |
|---|---------|------------|------|
| 2 | 5214517 |            |      |
| 3 | 5199627 |            |      |
|   |         | 5205502.18 | 0.16 |
| 4 | 5195805 |            |      |
| 5 | 5203369 |            |      |
| 6 | 5198330 |            |      |

---

**Table S16** Results of recovery test results

| Serial<br>number | Weight<br>(g) | Peak<br>area | Measured<br>(g) | Recovery<br>(%) | Average<br>(%) | RSD<br>(%) |
|------------------|---------------|--------------|-----------------|-----------------|----------------|------------|
| 80%-1            | 0.02005       | 3960242      | 0.02007         | 100.13          |                |            |
| 80%-2            | 0.02006       | 3946778      | 0.02001         | 99.74           | 100.05         | 0.23       |
| 80%-3            | 0.02003       | 3962294      | 0.02009         | 100.28          |                |            |
| 100%-1           | 0.02503       | 5212628      | 0.02500         | 99.88           |                |            |
| 100%-2           | 0.02504       | 5198600      | 0.02493         | 99.57           | 99.82          | 0.18       |
| 100%-3           | 0.02506       | 5225353      | 0.02506         | 100.00          |                |            |
| 120%-1           | 0.03001       | 5753869      | 0.02992         | 99.67           |                |            |
| 120%-2           | 0.03003       | 5771713      | 0.03001         | 99.93           | 99.87          | 0.14       |
| 120%-3           | 0.03004       | 5776815      | 0.03004         | 100.00          |                |            |

---



**Table S17** The influence of various factors on HM475

| HM475 content（%） | high temperature | high humidity | direct sunlight |
|------------------|------------------|---------------|-----------------|
| Zero day         | 99.16            | 99.16         | 99.16           |
| Fifth day        | 98.96            | 98.66         | 98.88           |
| Tenth day        | 98.57            | 98.21         | 98.76           |

**Table S18** Results of accelerated test

| HM475 content（%） | 190304 | 190313 | 190402 |
|------------------|--------|--------|--------|
| Zero month       | 99.16  | 99.14  | 99.17  |
| First month      | 99.01  | 98.99  | 99.11  |
| Second month     | 98.83  | 98.79  | 98.89  |
| Third month      | 98.65  | 98.69  | 98.56  |
| Sixth month      | 98.27  | 98.16  | 98.23  |

**Table S19** Results of long-term test

| HM475 content（%） | 190304 | 190313 | 190402 |
|------------------|--------|--------|--------|
| Zero month       | 99.16  | 99.14  | 99.17  |
| Third month      | 99.05  | 98.93  | 99.08  |
| Sixth month      | 98.83  | 98.87  | 98.81  |
| Ninth month      | 98.69  | 98.52  | 98.62  |
| Twelfth month    | 98.45  | 98.34  | 98.41  |
